# Supplementary material for: Population genomics and history of speciation reveal fishery management gaps in two related redfish species (Sebastes mentella and Sebastes fasciatus)
Source: PubMed Central journal article supplement (PMC7896722; doi:10.1111/eva.13143), 2020-12-14
Supplement: EVA-14-588-s003.pdf [file EVA-14-588-s003.pdf]

Sampling location A

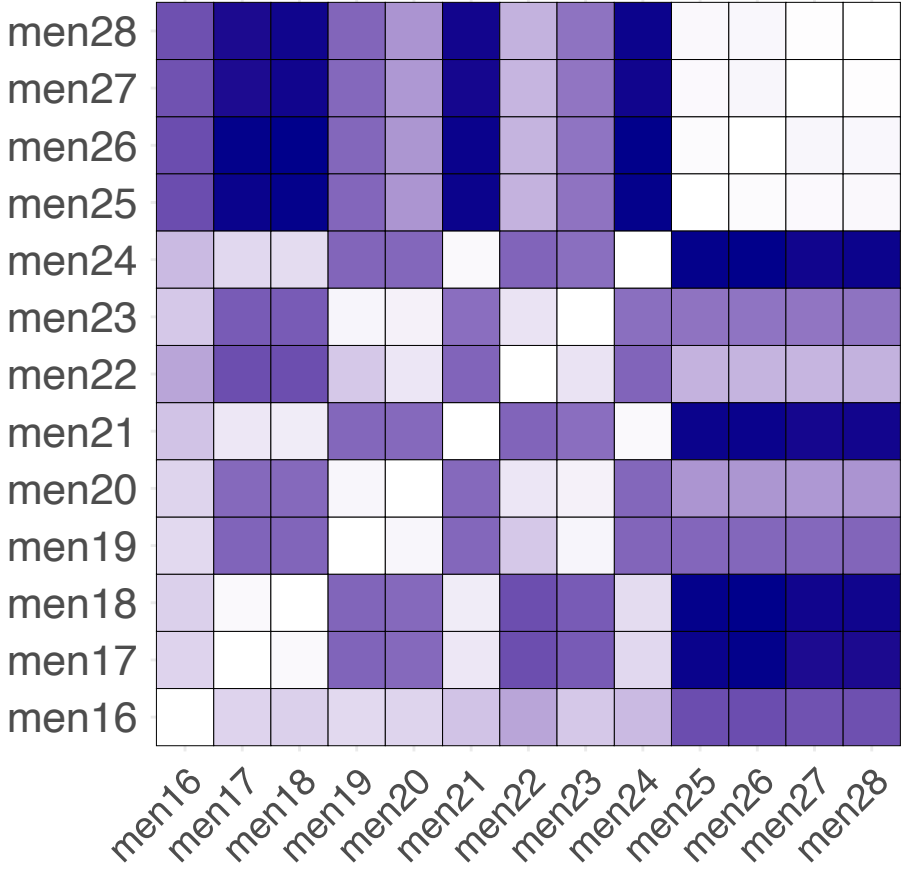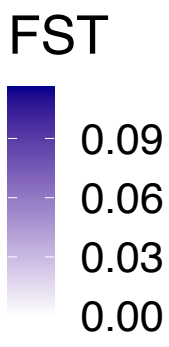

Sampling location A

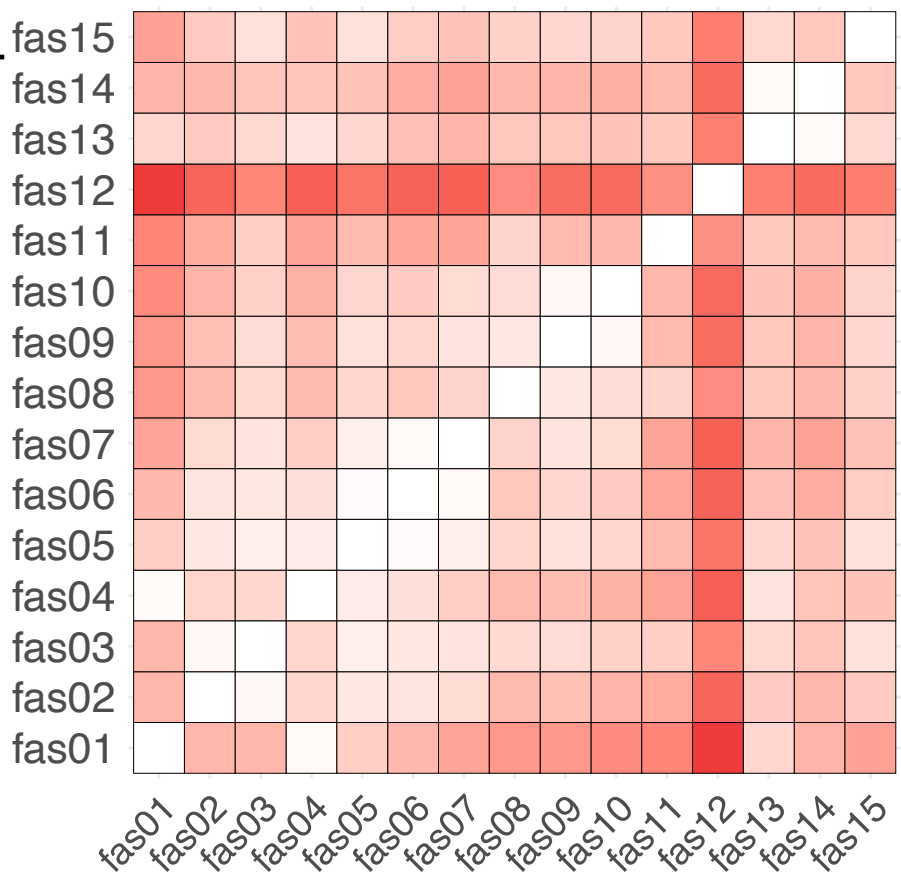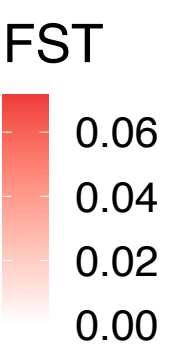

Sampling location B
